# Supplementary material for: Sub-10-fs observation of bound exciton formation in organic optoelectronic devices
Source: PubMed Central journal article supplement (PMC9399228; doi:10.1038/s41467-022-32478-8), 2022-08-23
Supplement: 41467_2022_32478_MOESM1_ESM.pdf [file 41467_2022_32478_MOESM1_ESM.pdf]

## 20 **Experimental Methods**

21 **Materials.** The sample is an inverted device with ITO/ ZnO/ F8 (annealed)/MoO<sub>3</sub>/Ag  
22 transparent device structure. Fabrication details follows: The devices were fabricated on ITO  
23 coated transparent glass substrate with sheet resistance 15 ohm/square. The ITO substrates  
24 were sequentially cleaned by sonication with detergent, deionized water, acetone, and  
25 isopropanol, followed by oxygen plasma treatment. Onto the plasma treated ITO substrate  
26 the ZnO precursor solution is deposited by spin-coating a zinc acetate dihydrate precursor  
27 solution (60.4  $\mu$ L 1-ethanolamine in 2 mL 2-methoxyethanol) followed by annealing at 150 °C  
28 for 10 min, yielding 30nm of a ZnO. The active layer solution of F8 is made in Chlorobenzene  
29 with concentration of 40 mg/ml in the glovebox. The active layer of F8 is spin coated on to  
30 the ZnO layer and annealed at 145C to achieve xx nm in the inert atmosphere. Following the  
31 deposition of the active layers, MoO<sub>3</sub> (10 nm) and Ag (15 nm) layers were deposited by  
32 evaporation through a shadow mask yielding active areas of 0.045 cm<sup>2</sup> in each pixel yielding  
33 a transparent device.

34 **Linear optical characterization.** UV-Vis absorption spectra of the PFO sample were obtained  
35 using a Shimadzu 2600 spectrometer equipped with an ISR-2600Plus integrating sphere  
36 attachment. The slit width was 5 nm and the sampling interval was 1 nm.

37 **Transient absorption with 200-fs time resolution.** A commercially available broadband  
38 pump-probe femtosecond (fs) transient absorption spectrometer Helios (Spectra Physics,  
39 Newport Corp.) was used to measure the transient absorption spectra and kinetics for PFO thin  
40 film samples. Ultrafast laser pulses (800 nm, 100 fs duration) were generated by a 1 kHz  
41 Ti:sapphire regenerative amplifier (Solstice, Spectra Physics, Newport Corp.). One portion of  
42 the 800 nmpulse was directed to an optical parametric amplifier (TOPAS Prime, Spectra-  
43 Physics) and a frequency mixer (Niruvis, Light Conversion) to tune the visible pump pulses to

44 390 nm. The pump pulses were modulated at a frequency of 500 Hz by a mechanical chopper.  
45 The rest of the 800 nm pulse was routed onto a mechanical delay stage with a 6 ns time window  
46 and directed through a non-linear crystal (sapphire for the visible region and YAG for the NIR  
47 region) to generate a white light probe ranging from 400 – 1600 nm. The probe pulse was split  
48 into two by a neutral density filter. One portion of the probe pulse served as the reference and  
49 was directly sent to the fiber-optic coupled multichannel spectrometers (CCD and InGaAs  
50 sensors). The rest of the probe pulse together with the pump pulse were focused onto the same  
51 spot on the samples with a beam size of around 0.5 mm<sup>2</sup> before sending it to the spectrometer.  
52 To compensate the fluctuations, the measured spectrum was normalized to the reference  
53 spectrum and averaged for several scans to achieve a good signal-to-noise ratio. Data analysis  
54 was performed with the commercialized Surface Xplorer software unless otherwise stated. The  
55 pump pulse fluence was <10μJ/cm<sup>2</sup> to avoid non-linear processes. The PFO sample was kept  
56 under nitrogen during measurements.

57

58 **Sub-10-fs PP, PPC and PPPL experimental apparatus.**

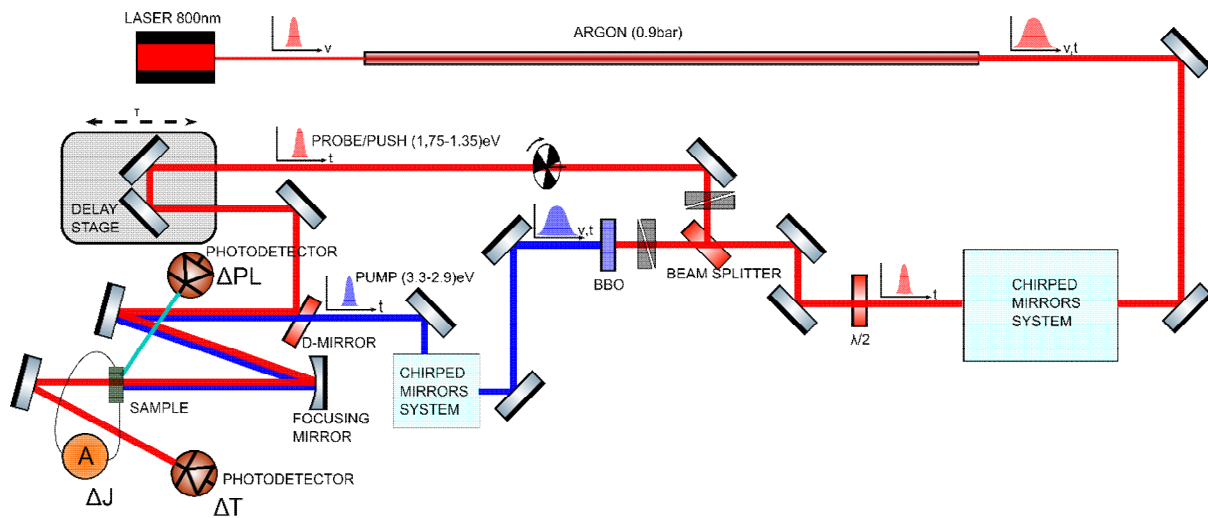

59

60 **Supplementary Fig. 1. Experimental apparatus of sub-10fs PP, PPC and PPPL experiments.**

61 Supplementary Fig. 1 shows the experimental apparatus for sub-10-fs PP, PPC and PPPL. A  
 62 commercial hollow-fibre pulse compression (HFPC) system (ICON, Imperial College) was  
 63 used to generate sub-10-fs pulses from a 800 nm, 50 fs Ti:sapphire laser (Coherent Astrella,  
 64 2.5 W, 4 kHz pulse repetition rate). The 50 fs pulses, at an average power of 1.25 W (~300 μJ),  
 65 were coupled into a 250 μm diameter differentially-pumped hollow-core fibre (evacuated with  
 66 a vacuum pump at the fibre entrance and filled with argon at 0.9 bar at the fibre exit) to  
 67 spectrally broaden the pulse, thus permitting pulse temporal compression. The HFPC system  
 68 uses beam-pointing stabilisation to lock the position and angle of the input beam to the entrance  
 69 of the fibre to ensure the long-term stability required for lengthy data scans. The output pulses  
 70 from the fibre have photon energies in the range 1.4-1.9 eV (650-900 nm). Temporal  
 71 compression to sub-10-fs duration was achieved via dispersion compensation from 10 bounces  
 72 off chirped mirrors (Layertec, 40 fs<sup>2</sup> per bounce). The compressed pulses were split  
 73 approximately 50/50 into two arms using a d-cut mirror. The first arm is the probe/push arm  
 74 where the sub-10-fs pulse serves as the probe/push pulse and passes through a micrometre-

75 precision delay stage (*LNR50 Series Encoded, Linear, Long-travel Translation Stage,*  
76 *Thorlabs*) to control the time delay between the pump and probe/push pulses. The second arm  
77 is the pump arm where a 50  $\mu\text{m}$  BBO crystal is used to generate a pump pulse centred around  
78 3.1 eV (400 nm) using Type-I second harmonic generation. Another set of chirped mirrors  
79 (Ultrafast Innovations, 50 fs<sup>2</sup> per bounce) was used to compensate the 400 nm beam for  
80 dispersion in the BBO crystal and the air path, resulting in sub-10-fs pump pulses. A waveplate  
81 was inserted before the d-cut mirror to ensure that the polarisation of the second harmonic was  
82 orientated correctly for the pump chirped mirrors. The dispersion in each of the arms is  
83 independently optimised by fine tuning the amount of glass in the optical path via two sets of  
84 AR coated glass wedges mounted on translation stages. The two beams (pump and probe/push)  
85 were then recombined using a second d-cut mirror and focused into the sample-device with a  
86  $f = 30$  cm focusing mirror using a small angle of incidence ( $<5^\circ$ ) to minimise astigmatism.  
87 Photodetectors detected the transmitted probe pulse for PP experiments and the sample's  
88 photoluminescence for PPPL experiments, while for PPC experiments, the sample-device was  
89 connected to a photocurrent detector (MFLI Lock-in Amplifier, Zurich Instruments Ltd.). A  
90 chopper wheel was placed either in the probe/push arm or the pump arm for PPPL/PPC and  
91 PP experiments, respectively. Reflective optical components were used to avoid additional  
92 dispersion compensation and to preserve the temporal resolution crucial for tracking bound  
93 exciton formation

94 Supplementary Fig. 2 shows the spectra of pump and probe/push pulses used in this study and  
95 generated with the above experimental apparatus.

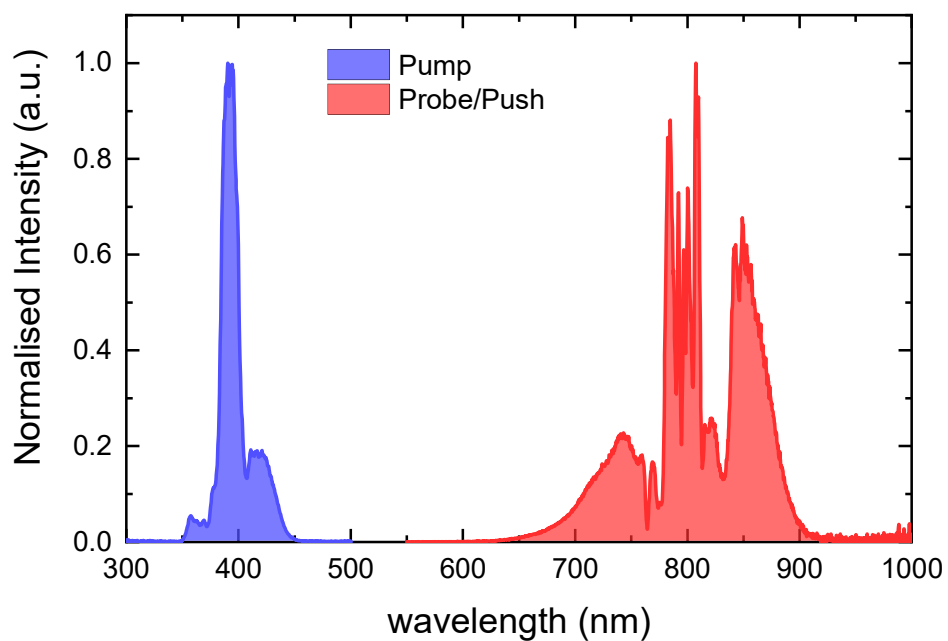

96

97 **Supplementary Fig. 2.** Normalised pump (blue) and probe/push (red) pulses spectra.

98 The push pulse duration was measured to be 8.4 fs FWHM using the d-scan technique<sup>1,2</sup>. A  
99 cross-correlation of the pump and probe/push pulses in the sample was carried out, giving a  
100 cross-correlation width of below 10 fs; therefore, a sub-10-fs time resolution is achieved in PP,  
101 PPC and PPPL.

102

103 **Time Resolved Spectroscopy**

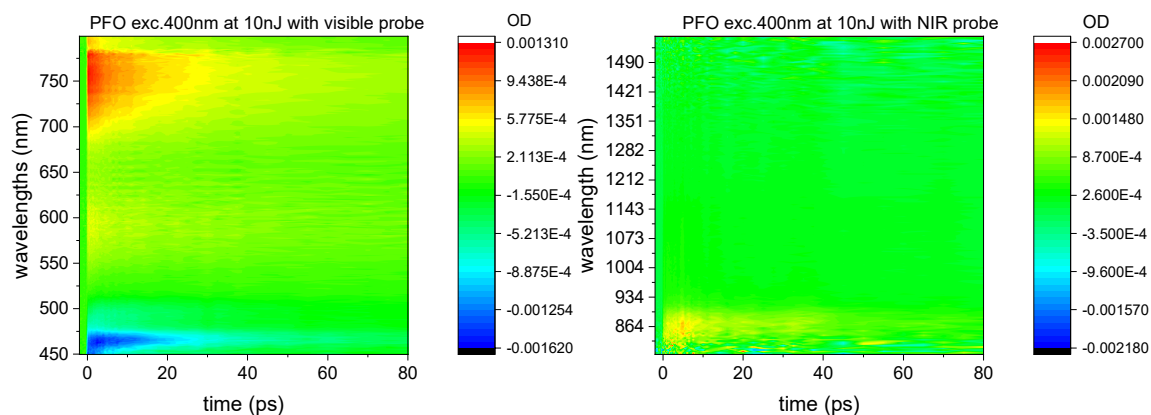

104

105 *Supplementary Fig. 3. 2D map of Transient Absorption spectroscopy with >200fs time*  
106 *resolution of PFO excited by 400nm and 10nJ pulse energy, left: detection in visible range,*  
107 *right: detection in NIR.*

108 Supplementary Fig. 3 shows the 2D maps of Transient Absorption (TA) spectroscopy with  
109 >200fs time resolution of PFO. In the visible detection two positive and one negative band are  
110 observed. In the NIR only one positive band is observed which is the same with the positive  
111 band in longer wavelengths with the visible detection. The negative band corresponds to  
112 stimulated emission and ground state bleaching.

113

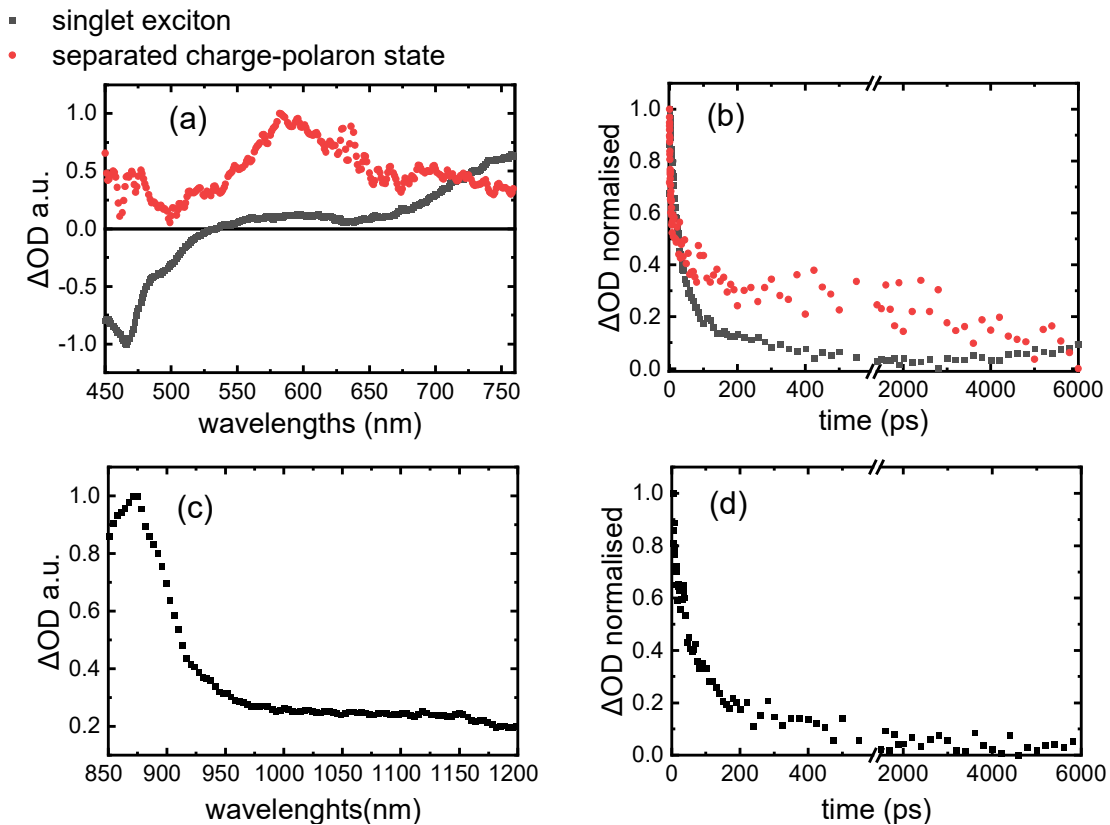

114

115 **Supplementary Fig. 4.** *The 2D map global analysis results. a) two components from global*  
 116 *analysis of TA in the visible area. b) dynamics of the two components in the visible range, c)*  
 117 *single component from global analysis of TA in the NIR area, d) dynamics of the NIR*  
 118 *component.*

119 Supplementary Fig. 4 shows global analysis of the 2D map of Supplementary Fig. 3. There are  
 120 two main components. The first is long-lived, causing the positive band around 600 nm and is  
 121 assigned to charge separated states. The second has a shorter lifetime around 200 ps and causes  
 122 the negative band of bleaching and stimulated emission; therefore, it is assigned to excitons. A  
 123 lifetime of 200 ps supports the omission of exciton relaxation in the experimental and  
 124 theoretical analysis of sub-10 fs PP and PPC.



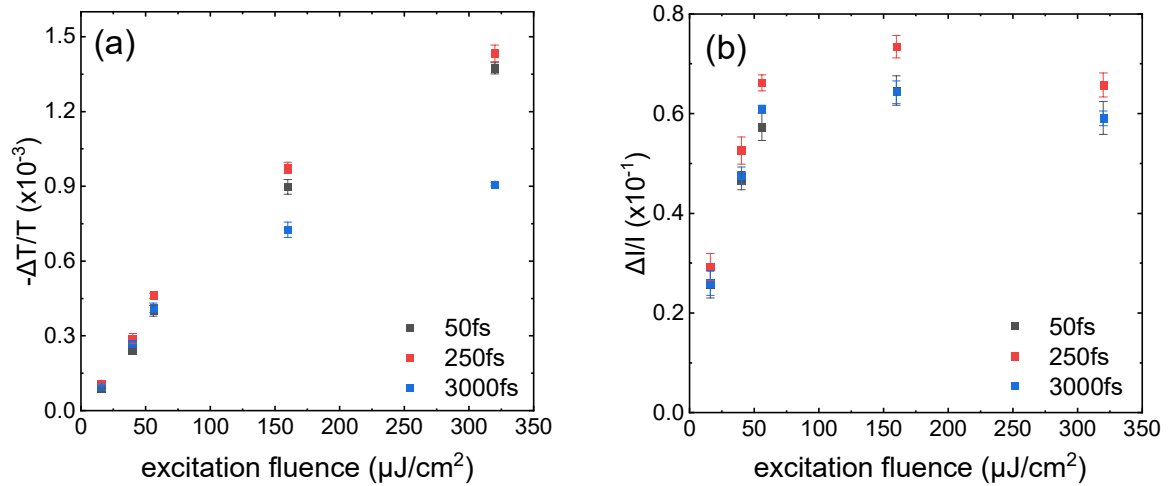

125

126 **Supplementary Fig. 5.**  $-\Delta T/T$  (a) and  $\Delta PC/PC$  (b) at 50fs, 250fs, and 3000fs after pump  
 127 excitation as a function of excitation flux intensity. Error bars are experimental statistical  
 128 standard errors.

129 In Supplementary Fig. 5 PP and PPC signals for 50fs, 250fs, and 3000fs for increased  
 130 excitation fluence is shown. Linear response is observed mainly below  $100\mu\text{J}/\text{cm}^2$  and agrees  
 131 with Cheetham et al. 2019. For higher excitation flux intensities there is a sub-linear response  
 132 for  $-\Delta T/T$  and a saturation for  $\Delta PC/PC$ . Evidence of sub-linear response and absence of super-  
 133 linearity in  $-\Delta T/T$  erases multiphoton absorption of pump pulse. The already high signal of  $\Delta I/I$   
 134 at 50fs and similar to 250fs supports the idea of ultrafast bound excitons. Also, the increase  
 135 between 50fs and 250fs observed in both  $-\Delta T/T$  and  $\Delta PC/PC$  signals reveals the existence of  
 136 another mechanism of exciton binding yet this increase is relatively small compared to the  
 137 signal at 50fs showing that the fast growth is the dominant mechanism of exciton binding.

138

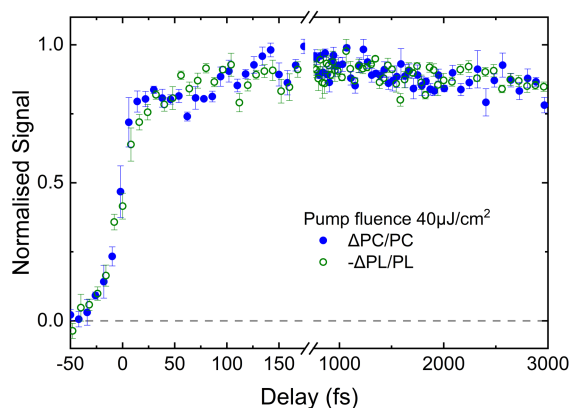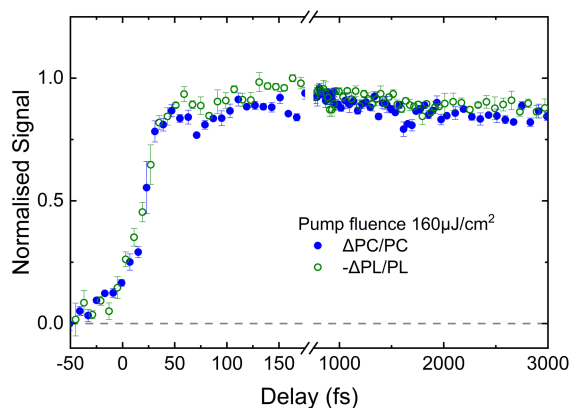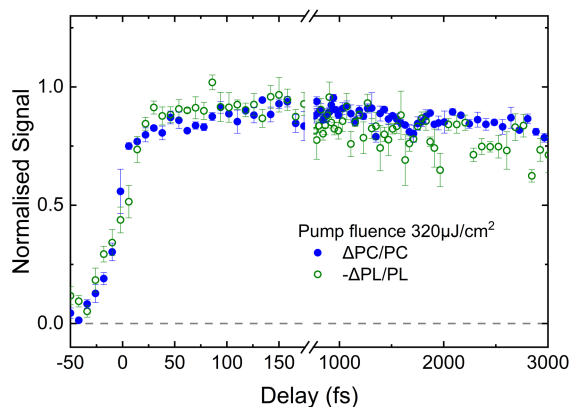

139

140 **Supplementary Fig. 6.** *PPPC (blue) and PPPL (green) transients at different excitation*  
 141 *fluences at orthogonal polarisation of pump and push beams.*

142 Supplementary Fig. 6 shows that PPC (blue) and PPPL (green) depict similar dynamics at  
 143 different excitation fluences. This verifies that, the PPC and the PPPL experiments push and  
 144 track same excited state, that is, purely singlet excitons, as PPPL addresses only emissive states.  
 145 The negative sign at PPPL occurs because push pulse is absorbed by excitons and splits them  
 146 into charges, decreasing the PL.

147 **Modelling**

148

149

$$\frac{dn_0}{dt} = -I_{pump}(t) \cdot n_g + a/2 \cdot n_1^2 \quad (1)$$

$$\frac{dn_n}{dt} = I_{pump}(t) \cdot n_g - c \cdot n_n - k \cdot n_n + a/2 \cdot n_1^2 + I_{push}(t, \tau_{delay}) \cdot n_1 \quad (2)$$

$$\frac{dn_1}{dt} = -I_{push}(t, \tau_{delay}) \cdot n_1 + c \cdot n_n - a \cdot n_1^2 \quad (3)$$

$$\frac{dn_c}{dt} = k \cdot n_n \quad (4)$$

150 The equations above describe the model in Figure 3a, where  $n_g$  the ground state population,  $n_n$   
 151 the population of higher electronic state,  $n_1$  the population of singlet exciton state and  $n_c$  the  
 152 population of charge separated states. The rate constants for cooling, charge transfer and  
 153 exciton-exciton annihilation are denoted as  $c$ ,  $k$  and,  $a$ , respectively. For the pump and push  
 154 term,  $I_{pump}(t)$ ,  $I_{push}(t, \tau_{delay})$ , gaussian functions are used with  $\sigma = 10$ fs. The push term is  
 155 also a function of  $\tau_{delay}$  which is assigned to the pump-push delay-time. The recombination  
 156 rate of singlet exciton is omitted because of its long timescale (derived from TA data) compared  
 157 to the short timescales under investigation.

158 Inclusion of the non-linear exciton-exciton annihilation term which cannot be neglected in high  
 159 pump fluences, requires that the coupled differential equations are solved numerically, and so  
 160 both low and high excitation fluences are numerically solved using midpoint method  
 161 implemented in python programming.

162 To simulate the PP experiment the above differential equation system is solved without the  
 163 term describing push-pulse,  $I_{push}(t, \tau_{delay})$ . The time evolution of  $n_1$  state, that is  $n_1(t)$ ,  
 164 describes kinetics of the singlet exciton state. In other words,  $n_1(t) \propto \Delta T/T$ .

165 To simulate the PPPC experiment, the analysis is not so straight forward, as  $I_{push}(t, \tau_{delay})$   
166 term needs to be included which contains the  $\tau_{delay}$ .

167 We assume that the only states which contributes to photocurrent are the charge separated states  
168  $n_c$ . Then two problems emerge. We cannot know (i) the exact percentage of separated charges  
169 contributing to photocurrent and (ii) the exact time at which the separated charges are extracted  
170 for the photocurrent after their generation. However, since PPPC is the transient photocurrent,  
171 (i) is eliminated as we assume that the percentage of separated charges contributing to  
172 photocurrent is the same regardless of the charge separated states density. The (ii) can be  
173 arbitrary as the same extraction time is taken whether push-pulse is present or not. Herein we  
174 use  $t = 6ps$  as the extraction time.

175 To derive from the modelling the PPPC signal as a function of the  $\tau_{delay}$ , we need to calculate  
176 the population of  $n_c$  at  $6ps$  with the push-term at each  $\tau_{delay}$  and without the push-term. The  
177 difference of these two populations for each  $\tau_{delay}$  is proportional to the PPPC signal at this  
178  $\tau_{delay}$ . In other words,  $n_{cwithpush}(t = 6ps, \tau_{delay}) - n_{cwithoutpush}(t = 6ps) \propto \Delta I /$   
179  $I(\tau_{delay})$

180 For example, to calculate the PPPC at  $\tau_{delay} = 500fs$ , we need a) to use  $I_{push}(t, \tau_{delay} =$   
181  $500fs)$  and then solve the above system of differential equation to derive  
182 the  $n_{cwithpush}(t, \tau_{delay} = 500fs)$  and b) to solve the system without the push-term to derive  
183 the  $n_{cwithoutpush}(t)$ . Then, the final step is to set  $t = 6ps$  and do the subtraction  
184  $n_{cwithpush}(t = 6ps, \tau_{delay} = 500fs) - n_{cwithoutpush}(t = 6ps)$  which is proportional to the  
185 PPPC ( $\tau_{delay} = 500fs$ ) signal. To construct the PPPC kinetics, above steps needs to be done  
186 for all  $\tau_{delay}$ .

187 Then theoretical PP and PPC data are fitted to the experimental PP and PPC data to  
188 investigate the validity of the model and extract the fitted parameters of  $c$ ,  $k$  and,  $a$ .

189 Global fitting using pairs of PP and PPC of similar pump fluence gives the fitting traces shown  
190 on Figure 2. Here global fitting was undertaken with  $c$ ,  $k$  and,  $a$  as shared parameters and push  
191 and pump excitation term to be free parameters. For the Figure 3b the global fitting was  
192 undertaken with the same conditions but having now the push-term constant. Although pump-  
193 term was a free parameter, global fitting showed that the value of the pump-term was increasing  
194 proportionally to the experimental pump fluence as we fitted higher pump-fluences.

195 We note that for higher fluences the model starts to deviate and is not adequate to describe  
196 experimental data as other non-linear mechanisms are expected to contribute significantly e.g.,  
197 exciton-polaron annihilation. Supplementary Fig. 7 shows this deviation at higher excitation  
198 fluences.

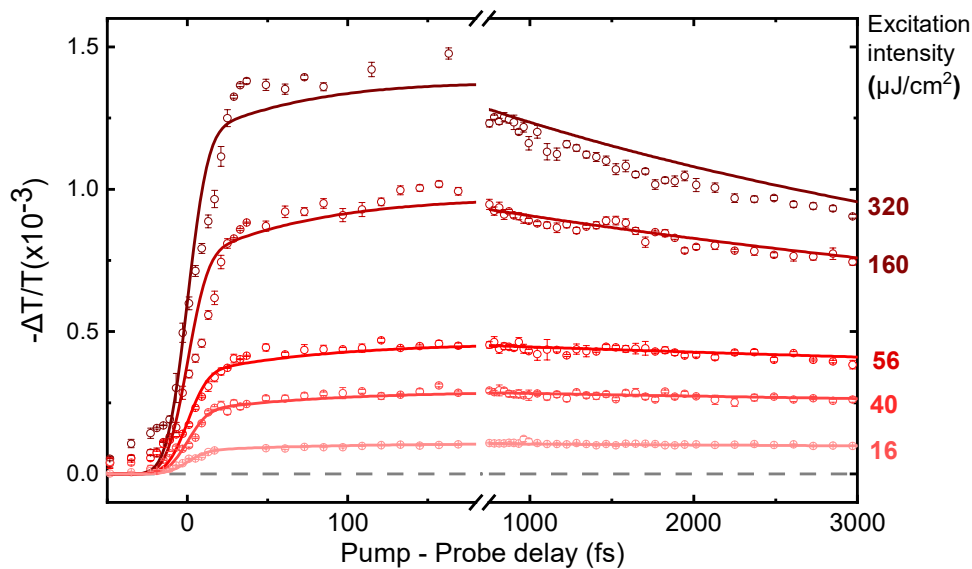

199  
200 **Supplementary Fig. 7.** PP transient transmission for different excitation fluences. Excitation  
201 fluence varies from  $16 \mu\text{J}/\text{cm}^2$  up to  $320 \mu\text{J}/\text{cm}^2$ .

202

## 203 **Molecular Dynamics**

204 For the quantum calculation we use the NEXMD program<sup>3,4</sup>. We use the program to both  
205 simulate the absorption spectrum of the PFO polymer as well as its dynamics in the first few  
206 100 ps following a photoexcitation. We use a PFO pentamer for all the calculations below.

207 For the simulation of the absorption spectrum of the polymer, we first get the optimised  
208 geometry of the pentamer using the Austin Model 1 (AM1) semiempirical model Hamiltonian  
209 following the method used by Clark et al<sup>5</sup>. Then we calculate a ground state trajectory, to  
210 generate the different initial geometries of the molecule. We do an AM1 ground state molecular  
211 dynamics simulation of 1 ps long at 300K with time steps of 0.1fs. The Langevin thermostat  
212 was used to keep the temperature constant with a friction coefficient  $\zeta = 2.0 \text{ ps}^{-1}$ . These  
213 trajectories were used to collect as set of initial positions for the subsequent excited state  
214 calculation. We used 1000 different initial positions and the subsequent data shown are an  
215 average of all these trajectories.

216 The optical absorption of the PFO pentamer is shown in Supplementary Fig. 8, with the  
217 absorption of the different electronic excited states shown in different colours. Here we only  
218 show the absorption of the first 4 excited states, as they are the ones absorbing in the region of  
219 the pump laser. Considering the level of theory and the simplified system simulated, the  
220 agreement with the experiment is not bad. The results in Supplementary Fig. 8 show that the  
221 pump laser will mainly excite the S1 state, but we cannot neglect the contribution from the S2  
222 and S3 states.

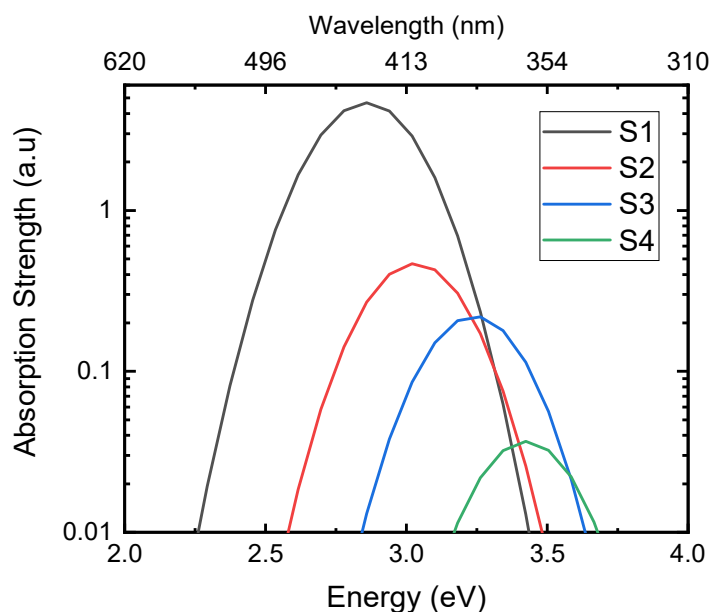

223 **Supplementary Fig. 8.** Calculated ground state absorption of the PFO pentamer. Molecular  
 224 dynamics show that pump pulse can populate the 4 lowest energy excited states.<sup>4</sup>  
 225

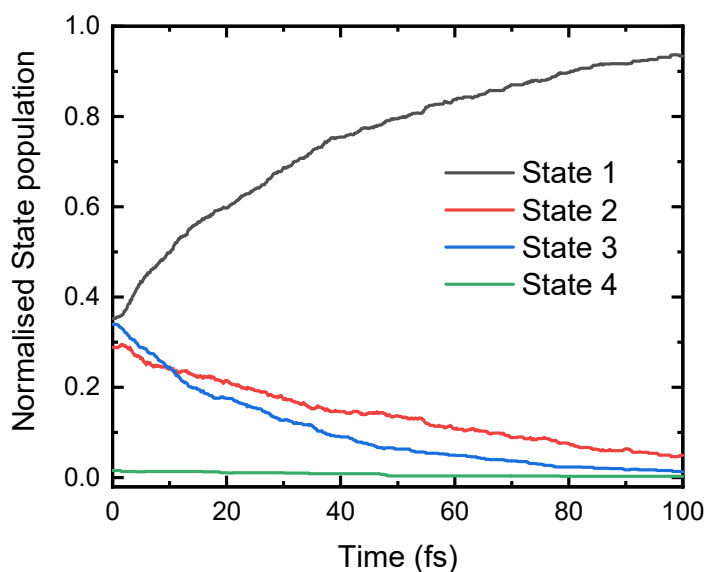

226 **Supplementary Fig. 9.** Simulated Excited state dynamics of a PFO pentamer following an  
 227 excitation of 3.2 eV.  
 228

229 Supplementary Fig. 9 shows the kinetics of the first 5 excited states. We focus on S1, S2 and  
 230 S3 excited states as they are populated by the pump energies as Supplementary Fig. 8 shows.  
 231 S2 and S3 states are instantly populated, and they depopulate completely within the first 100fs.

232 At the same time, while S1 state is also instantly populated by the pump, it populates even  
233 more within the first 100fs. We believe that this later population of S1 state originated from S2  
234 and S3 states' depopulation as the time constants seems to agree.

235

## 236 **Supplementary References**

- 237 1. Miranda, M. *et al.* Characterization of broadband few-cycle laser pulses with the d-  
238 scan technique. *Opt. Express* **20**, 18732–18743 (2012).
- 239 2. Sytceвич, I. *et al.* Characterizing ultrashort laser pulses with second harmonic  
240 dispersion scans. *J. Opt. Soc. Am. B* **38**, 1546–1555 (2021).
- 241 3. Nelson, T., Fernandez-Alberti, S., Roitberg, A. E. & Tretiak, S. Nonadiabatic excited-  
242 state molecular dynamics: Modeling photophysics in organic conjugated materials.  
243 *Acc. Chem. Res.* **47**, 1155–1164 (2014).
- 244 4. Nelson, T., Fernandez-Aberti, S., Chernyak, V., Roitberg, A. E. & Tretiak, S.  
245 Nonadiabatic excited-state molecular dynamics modeling of photoinduced dynamics in  
246 conjugated molecules. *J. Phys. Chem. B* **115**, 5402–5414 (2011).
- 247 5. Clark, J., Nelson, T., Tretiak, S., Cirmi, G. & Lanzani, G. Femtosecond torsional  
248 relaxation. *Nat. Phys.* **8**, 225–231 (2012).

249
